1  
2  
3  
4  
5 **Respiratory and intestinal epithelial cells exhibit differential susceptibility and innate**  
6 **immune responses to contemporary EV-D68 isolates**  
7  
8  
9

10  
11  
12  
13 Megan Culler Freeman<sup>1</sup>, Alexandra I. Wells<sup>1, 2</sup>, Jessica Ciomperlik-Patton<sup>4</sup>, Michael M.  
14 Myerburg<sup>3</sup>, Jennifer Anstadt<sup>4</sup>, and Carolyn B. Coyne<sup>1,2,\*</sup>  
15

16 <sup>1</sup>Department of Pediatrics, Division of Infectious Diseases, UPMC Children's Hospital of  
17 Pittsburgh, Pittsburgh, PA, USA, <sup>2</sup>Center for Microbial Pathogenesis, UPMC Children's Hospital  
18 of Pittsburgh, Pittsburgh, PA, USA, <sup>3</sup>Pulmonary, Allergy and Critical Care Medicine, University of  
19 Pittsburgh School of Medicine, Pittsburgh, PA <sup>4</sup>Division of Viral Diseases, Centers for Disease  
20 Control and Prevention, Atlanta, GA  
21

22 Keywords: Enterovirus D68, airway, enteroid, interferon

23 Running Title: EVD68 infection in respiratory and intestinal epithelium  
24  
25  
26  
27  
28  
29  
30

31 \*Corresponding author  
32 Carolyn Coyne, PhD  
33 9116 Rangos Research Center  
34 UPMC Children's Hospital of Pittsburgh  
35 One Children's Hospital Way  
36 4401 Penn Avenue  
37 Pittsburgh, PA 15224  
38 Phone (412) 692-7519  
39 Email [coynec2@pitt.edu](mailto:coynec2@pitt.edu)  
40

41 **Abstract:**

42 Enterovirus D68 (EV-D68) has been implicated in outbreaks of severe respiratory illness and  
43 acute flaccid myelitis (AFM) and is detected in patient respiratory samples and from stool and  
44 wastewater, suggesting both respiratory and enteric routes of transmission. Here, we used a  
45 panel of EV-D68 isolates, including a historical isolate and multiple contemporary isolates from  
46 AFM outbreak years, to define the dynamics of viral replication and the host response to infection  
47 in primary human airway cells and stem cell-derived enteroids. We show that some recent EV-  
48 D68 isolates have decreased sensitivity to acid and temperature compared with an earlier isolate  
49 and that the respiratory, but not intestinal, epithelium induces a robust type III interferon (IFN)  
50 response that restricts infection. Our findings define the differential responses of the respiratory  
51 and intestinal epithelium to contemporary EV-D68 isolates and suggest that some isolates have  
52 the potential to target both the human airway and gastrointestinal tracts.

53

54

55

56

57

58

59

## 60 **Introduction**

61 Enteroviruses (EVs) are a family of positive-stranded RNA viruses, including  
62 coxsackieviruses, echoviruses, enterovirus A71 (EV-A71), and enterovirus D68 (EV-D68) that are  
63 responsible for a broad spectrum of illness in humans. EVs, specifically EV-D68 and EV-A71,  
64 have been associated with acute flaccid myelitis (AFM), a polio-like illness causing paralysis in  
65 previously healthy individuals, primarily children, which has peaked in even numbered years from  
66 at least 2014 until 2018 (Messacar et al., 2015; Midgley et al., 2015; Mishra et al., 2019; Schubert  
67 et al., 2019). While 2020 was anticipated to be a peak year for AFM, to date there has not been  
68 a surge of cases reported, perhaps indicating that coronavirus infection-control measures such  
69 as social distancing and mask usage have also diminished exposure to other circulating  
70 pathogens (CDC, 2020). While EVs are traditionally spread via the fecal-oral route, previous work  
71 with EV-D68 isolates before the AFM outbreak in 2014 suggested reduced replication in acidic  
72 environments and improved replication at lower temperature than traditional EVs, suggesting  
73 suitability for respiratory tract replication (Oberste, 2004).

74 EV-D68 has undergone rapid evolution since the 1990s, leading to the emergence of four  
75 clades, termed A-D (Du et al., 2015; Tokarz et al., 2012). This degree of evolution has led to loss  
76 of neutralization from pre-existing antibodies, highlighting the potential significance of these  
77 changes (Imamura et al., 2014). Contemporary EV-D68 isolates exhibit different biologic  
78 properties than historical reference isolates, including replication in neuronal cells (Brown et al.,  
79 2018). EV-D68 is often detected in patient respiratory samples, however, EV-D68 has also been  
80 isolated from stool specimens and wastewater, suggesting that it may also be transmitted by the  
81 fecal-oral route (Bisseux et al., 2018; Pham et al., 2017; Weil et al., 2017). The viral and host  
82 determinants that influence EV-D68 tropism remain largely unknown, particularly in the respiratory  
83 and gastrointestinal epithelium. Moreover, whether there are differences in the replication  
84 dynamics and/or host responses to isolates circulating prior to AFM outbreaks versus  
85 contemporary isolates is also unclear.

86           The EV-D68 reference isolate Fermon is often used as a historic isolate, due to its isolation  
87 in the mid-1960s. However, this isolate has undergone decades of passage through cell lines and  
88 has thus likely undergone changes that make it well-adapted for replication in cell culture and less  
89 representative of its original sequence when it was isolated from a child with pneumonia (Schieble  
90 et al., 1967). These changes highlight the need to perform comparative studies using pre-  
91 outbreak and contemporary EV-D68 isolates in order to define the viral and host determinants of  
92 infection. In this study, we performed comparative studies of replication kinetics, temperature  
93 sensitivity, polarity of infection, and cellular responses to infection using a panel of EV-D68  
94 isolates, including a historic isolate and multiple isolates from AFM outbreak years. To define host  
95 cell-type specific differences in EV-D68 replication and/or host responses, we performed  
96 comparative studies in primary human bronchial epithelial (HBE) cells grown at an air-liquid  
97 interface and in primary human stem-cell derived intestinal enteroids. We found that respiratory  
98 and intestinal cell lines were permissive to both historic and contemporary EV-D68 isolates, but  
99 that there were isolate-specific differences in temperature sensitivity at 33°C or 37°C. In contrast,  
100 primary HBE cells were largely resistant to EV-D68 replication, with only one isolate,  
101 KY/14/18953, able to replicate. KY/14/18953 and MA/18/23089 were able to replicate in human  
102 enteroids. Primary HBE, but not enteroids, mount a robust innate immune response to EV-D68  
103 infection, characterized by the induction of type III interferons (IFNs) and to a lesser extent type I  
104 IFNs. Lastly, we show that inhibition of IFN signaling enhances EV-D68 replication in primary  
105 HBE, supporting a role for this signaling in the control of viral replication in the airway. Collectively,  
106 these data define the differential responses of the respiratory and intestinal epithelium to historic  
107 and contemporary EV-D68 isolates.

108

## 109 **Results**

### 110 **EV-D68 replication in lung and intestinal cell lines varies with isolate and temperature**

111 We sought to evaluate the replication competency of a panel of EV-D68 isolates, including a  
112 historical 2009 isolate and five contemporary isolates from outbreaks in the AFM peak years of  
113 2014 and 2018 in cell lines representing the respiratory and intestinal tracts (details of viral  
114 isolates can be found in **Supplemental Table 1**). To do this, we used the MD/09/23229 isolate,  
115 collected in 2009 and in clade A, as a reference isolate prior to the 2014 outbreak and multiple  
116 isolates associated with AFM outbreak seasons, including 2014 and 2018. These isolates are  
117 inclusive of multiple clades, B1, B2, B3, and D1, (Du et al., 2015; Hadfield et al., 2018; Sagulenko  
118 et al., 2018; Sun et al., 2019) that have been associated with peak-year AFM outbreaks. In  
119 addition, KY/14/18953 and US/IL/18952 isolates are paralytogenic in mouse models (Brown et  
120 al., 2018; Hixon et al., 2017). We evaluated replication at 33°C and at 37°C in Calu-3 cells, a lung  
121 adenocarcinoma cell line and in Caco-2 cells, a colon adenocarcinoma cell line. We found that  
122 while all isolates replicated to some degree at 33°C in Calu-3 cells, two isolates, MD/09/23229  
123 and MA/18/23089, were unable to efficiently replicate at 37°C (**Figure 1A**). In Caco-2 cells, all  
124 isolates were able to replicate at 33°C (**Figure 1B**). When infections were performed at 37°C,  
125 MA/18/23089 and KY/14/18953 continued to replicate well over background in Caco-2 cells  
126 (**Figure 1B**). In contrast, infections in Calu-3 cells performed at 37°C severely restricted the  
127 replication of several isolates, including MD/09/23229, IL/14/18952, and MO/14/18949, whereas  
128 the replication of KY/14/18953 was less severely restricted (**Figure 1A**). Collectively, these  
129 studies suggest that select EV-D68 isolates exhibit cell type-specific sensitivity to temperature in  
130 cell lines (summarized in **Figure 1C**).

131

### 132 **Some contemporary EV-D68 isolates have increased acid tolerance**

133 We found that all EV-D68 isolates were capable of replicating in gastrointestinal-derived cell lines.  
134 However, in addition to cellular tropism, enteric viruses must be stable in acidic environments to  
135 infect the GI tract. Previous work suggested that select EV-D68 isolates were destabilized

136 following exposure to low pH (pH 4-6) as a mechanism of genome release during vial entry (Liu  
137 et al., 2018). However, whether this instability might influence the enteric route of transmission is  
138 unclear. In order to define the stability of EV-D68 virions in various conditions that mimic the  
139 environment in the GI tract, we exposed historical and contemporary isolates of EV-D68 to  
140 simulated intestinal fluids of the stomach and fed and fasted states of the small intestine over  
141 short (30 min) and long (60-120 min) exposure times. These fluids reflect not only the differential  
142 pH of the GI tract, but also contain bile acid and phospholipids that better recapitulate some  
143 aspects of the GI luminal content. To compare the stability of EV-D68 to other members of the  
144 enterovirus family that are transmitted primarily via the fecal-oral route, we performed similar  
145 studies with echovirus 11 (E11) and EVA71. E11 and EVA71 were stable in both fed state small  
146 intestine (FeSSIF pH 5) and fasted state small intestine (FaSSIF pH 6.5) for all exposure times  
147 tested (**Figure 2A, 2B**). However, whereas E11 exhibited significant reductions in titer when  
148 exposed to fasted state simulated gastric fluid (FaSSGF pH 2.0), EV71 was less impacted by this  
149 exposure (**Figure 2A, 2B**). None of the EV-D68 isolates tested were able to withstand the most  
150 acidic fluid (FaSSGF, pH 2.0) (**Figure 2C-F**). However, whereas EV-D68 isolates were generally  
151 stable in FaSSIF pH 6.5 conditions (**Figure 2C-F**), there were isolate-specific differences in  
152 stability in FeSSIF pH 5 conditions, with KY/14/18953 and to a lesser extent MA/18/23089  
153 exhibiting some stability in this condition (**Figure 2D-F**). These data suggest that some  
154 contemporary isolates of EV-D68 exhibit enhanced stability in low pH conditions.

155

### 156 **Comparison of EV-D68 growth characteristics in primary human airway epithelial cells** 157 **and stem cell-derived enteroids**

158 We found that many EV-D68 isolates efficiently infected airway- and intestinal-derived cell lines,  
159 which occurred in a temperature-dependent manner (**Figure 1**). However, given that cell lines do  
160 not fully recapitulate the complexities of the airway and intestinal epithelium, we performed similar  
161 studies in primary cell models. To model the human airway, we used primary human bronchial

162 epithelial cells (HBE) grown at an air liquid interface (ALI). HBE have increased similarity to the  
163 human respiratory tract with respect to polarization, functional cilia, and mucus production than  
164 cell line-derived respiratory models and thus provide a more physiological system to study EV-  
165 D68 infections in the human airway. We infected HBE cells from at least two independent donors  
166 from either the apical (**Figure 3A, C, E, G**) or basolateral (**Figure 3B, D, F, H**) domains and  
167 measured viral titers in the apical (**Figure 3A-D**) and basolateral (**Figure 3E-H**) supernatants to  
168 determine whether EV-D68 exhibited a polarity of entry and/or release. We found that one isolate,  
169 KY/14/18953, infected similarly from the apical and basolateral domains at 33°C or 37°C (**Figure**  
170 **3A-D**), but exhibited preferential release from the apical surface (**Figure 3A-H**). In contrast,  
171 MD/09/23229 replicated more efficiently from the basolateral surface and exhibited a temperature  
172 preference for 33°C (**Figure 3A-D**). However, similar to KY/14/18953, it was also released  
173 preferentially from the apical surface (**Figure 3A-H**). Another contemporary isolate, IL/14/18952,  
174 infected best from the basolateral surface at 33°C while the contemporary isolate MA/18/23089  
175 infected primary HBE inefficiently from either domain or temperature (**Figure 3A-H**, summarized  
176 in **3I**). These data suggest that some isolates exhibit a preferential polarity of infection and are  
177 released primarily via the apical surface.

178         Next, we determined whether EV-D68 could infect GI-derived primary cells, particularly  
179 given that all isolates replicated to high titers in a GI-derived adenocarcinoma cell line (Caco-2).  
180 To do this, we used human primary stem cell-derived enteroids, which we used previously to  
181 define the cellular tropism of other enteroviruses in the GI epithelium (Drummond et al., 2017;  
182 Good et al., 2019). We found that only one isolate, KY/14/18953, replicated in human enteroids,  
183 which occurred in a temperature-independent manner but that there were very low levels of  
184 infection by other isolates tested, although MD/09/232229 exhibited some capacity to replicate to  
185 low levels (**Figure 4A-B**). A limitation of the above-described model is that enteroids grown in  
186 Matrigel exhibit an “inside out” polarity, with the luminal surface facing inward. As we have  
187 previously shown that some enteroviruses such as EV-A71 exhibit preferential infection of the

188 apical domain, we next determined whether EV-D68 exhibited a similar polarity, which might  
189 explain the low levels of infection in enteroids grown in Matrigel (Good et al., 2019). To address  
190 this, we cultured intestinal crypts on Transwell inserts, which allows for the development of a  
191 monolayer containing diverse intestinal cell types (Good et al., 2019). Similar to our studies in  
192 HBE, we infected intestinal monolayers from the apical (**Figure 4C, 4E**) or basolateral (**Figure**  
193 **4D, 4F**) domains and sampled the apical (**Figure 4C-D**) or basolateral (**Figure 4E-F**) supernatant  
194 for infectious virus. We found that KY/14/18953 replicated to high titers when inoculated from  
195 either the apical or basolateral surfaces but exhibited a preferential release into the apical  
196 compartment (**Figure 4C-F**), similar to what was observed in primary HBE. In contrast to our  
197 findings in Matrigel-derived enteroids, we found that MA/18/23089 replicated to high titers when  
198 infection was initiated from the apical surface, with slightly lower titers from the basolateral domain  
199 (**Figure 4C-F**). However, similar to KY/14/18953, this isolate also exhibited preferential release  
200 into the apical compartment (**Figure 4C-F**). Collectively, these data show that some contemporary  
201 isolates of EV-D68, particularly KY/14/18953, can replicate to higher titers in both primary HBE  
202 and enteroids (summarized in **Figure 3I** and **4G**). In contrast, the historical isolate MD/09/23229  
203 replicated to low titers in primary HBE, which only occurred at 33°C and was unable to replicate  
204 in enteroids (**Figure 3I** and **4G**).

205

### 206 **EV-D68 infection induces cell type-specific antiviral signaling**

207 To define the cellular response to EV-D68 infection in HBE and in enteroids, we first performed  
208 RNAseq-based whole transcriptional profiling using select EV-D68 isolates, the historic strain  
209 MD/09/23229 and, due to successful replication under all tested conditions, KY/14/18953.  
210 Consistent with our infectious titer data, HBE cells infected from the basolateral surface had  
211 higher viral RNA (vRNA) fragments per kilobase per million reads mapped (FPKM) reads than  
212 those infected apically (**Supplemental Figure 1A**). However, despite near-equivalent viral input,  
213 HBE cells infected with MD/09/23229 had higher vRNA FPKM values than those infected with



214 KY/14/18953 (**Supplemental Figure 1A**), despite higher infectious titers in cells infected with  
215 KY/14/18953. We found that vRNA FPKM values in enteroids infected with KY/14/18953 were  
216 significantly higher than those observed in HBE and that these values were independent of  
217 temperature, as we obtained similar values in enteroids infected at 33°C or 37°C (**Supplemental**  
218 **Figure 1A**). Next, we performed differential expression analysis to identify transcripts induced by  
219 EV-D68 infection. Despite significant differences in the levels of infection, HBE infected with either  
220 MD/09/23229 or KY/14/18953 from the basolateral surface induced similar numbers of transcripts,  
221 with MD/09/23229 inducing 178 (**Supplemental Figure 1B, Supplemental Table 3**) and  
222 KY/14/18953 inducing 189 (**Supplemental Figure 1C, Supplemental Table 3**). Consistent with  
223 the low levels of vRNA present in HBE infected from the apical surface, relatively very few  
224 transcripts were induced under these conditions, with MD/09/23229 inducing 37 (**Supplemental**  
225 **Figure 1B, Supplemental Table 3**) and KY/14/18953 inducing 30 (**Supplemental Figure 1C,**  
226 **Supplemental Table 1B**). Of the transcripts induced by basolateral infection, approximately half  
227 were shared between HBE infected with MD/09/23229 or KY/14/18953 (92 total, **Supplemental**  
228 **Table 4**). These transcripts were enriched in interferon stimulated genes (ISGs) (**Supplemental**  
229 **Figure 1F, Supplemental Table 4**). In contrast, there were very few transcripts induced by both  
230 HBE and enteroids infected with KY/14/18953, with only 9 transcripts shared between these  
231 conditions, despite enteroids inducing a greater total number of transcripts (332 total)  
232 (**Supplemental Figure 1E, Supplemental Table 5**). Of these transcripts, five included ISGs  
233 (MX2, IFIT3, IFIT1, IFI27, and IFITM1), which were induced in all conditions tested  
234 (**Supplemental Figure 1G**). Consistent with the induction of ISGs, HBE infected with  
235 MD/09/23229 or KY/14/18953 from the basolateral surface, and to a lesser extent the apical  
236 surface, potently induced the expression of the type III IFNs IFN- $\lambda$ 1-3, but not type I or II IFNs  
237 (**Supplemental Figure 1H**). In contrast, KY/14/18953 infection of enteroids elicited no significant  
238 induction of these transcripts, despite the higher levels of vRNA present in these samples

239 **(Supplemental Figure 1A, 1H)**. Taken together, these data suggest that there are cell type-  
240 specific differences in the response of HBE and enteroids to EV-D68 infection.

241

### 242 **EV-D68 infection of primary human airway cells preferentially induces type III IFNs**

243 Our RNASeq-based studies pointed to cell type-specific differences in the response of primary  
244 HBE and enteroids to EV-D68 infection. To further define the cellular response to EV-D68  
245 infection, we performed multianalyte Luminex-based assays for 37 pro-inflammatory cytokines in  
246 cells infected with historical and contemporary EV-D68 isolates at 33°C at both 24h and 48h post-  
247 infection. In HBE, we also directly compared the impact of the polarity of infection on cytokine  
248 induction. At 24h p.i., all EV-D68 isolates induced the type III IFNs IFN- $\lambda$ 1 and IFN- $\lambda$ 2, with little  
249 to no significant induction of the type I IFNs IFN- $\beta$  and IFN- $\alpha$ 2 (**Figure 5A-G**). Of note, despite  
250 the low levels of viral replication in HBE infected from the apical surface (**Figure 3**), we observed  
251 near-equivalent levels of IFN induction under these conditions (**Figure 5A-G**). At 48h p.i., levels  
252 of type III IFNs further increased to very high levels (>10ng/mL) (**Figure 5A, 5D-G**). In addition,  
253 at the later time point, we observed a significant induction of IFN- $\beta$ , but not IFN- $\alpha$ 2 (**Figure 5A-**  
254 **C**). In contrast to EV-D68-infected HBE, EV-D68 infection in enteroids did not induce detectable  
255 changes in any of the cytokines tested, including IFNs (**Figure 5A, 5D-G**). These data suggest  
256 that the airway and intestinal epithelium induce cell type-specific responses to EV-D68 infection.

257 Prior reports have suggested that *in vitro* respiratory virus replication differences at 33°C  
258 and 37°C may be related to increased IFN responses at higher temperatures (Foxman et al.,  
259 2015). To determine whether differential temperature-dependent IFN responses explained  
260 differences in EV-D68 replication in HBE at 33°C and 37°C, we again utilized Luminex-based  
261 multiplex assays against 37 pro-inflammatory cytokines, including type I and III IFNs. To do this,  
262 we compared infection of primary HBE cells with EV-D68 isolates MD/09/23229 and KY/14/18953  
263 at 33°C and 37°C for either 24 or 48 hpi. Despite differences in the efficiency of replication in HBE

264 at 33°C and 37°C, we did not detect any significant differences in the induction of type I (IFN-β)  
265 or III (IFN-λ1, IFN-λ2) IFNs under these conditions (**Supplemental Figure 2A-D**). In addition, we  
266 found that Calu-3 lung epithelial and Caco-2 intestinal epithelial cell lines did not mount an IFN-  
267 mediated immune response to EV-D68 infection at either temperature (**Supplemental Figure 2E-  
268 F**).

269

### 270 **IFN signaling restricts EV-D68 replication in primary human airway cells**

271 We observed robust IFN-mediated antiviral signaling in HBE cells infected with EV-D68 despite  
272 very low to undetectable levels of replication, suggesting that this antiviral response restricts EV-  
273 D68 infection. To test this, we infected HBE cells with EV-D68 in the presence of a selective small-  
274 molecule inhibitor of JAK1/2 signaling (ruxolitinib). Treatment of HBE with ruxolitinib significantly  
275 decreased the secretion of IFN-β and IFN-λ1 in response to EV-D68 infection (**Figure 6A-B**) and  
276 also significantly reduced ISG induction (**Figure 6C**). Consistent with this, there was a significant  
277 increase in MD/09/23229 infectious titers at 48 hpi as compared to DMSO-treated controls, with  
278 less robust enhancement of KY/14/18953 (**Figure 6D**).

279

### 280 **Discussion**

281 In this study, we define differences in the dynamics of EV-D68 replication and pH stability using  
282 a panel of isolates from AFM peak years and a pre-outbreak isolate. In addition, utilizing two  
283 primary human cell models representing common tissue sites targeted by enteroviruses in  
284 humans, we define differences in epithelial responses to EV-D68 between the respiratory and GI  
285 tracts. Collectively, this work details the varied responses of the respiratory and intestinal  
286 epithelium to historic and contemporary EV-D68 isolates and defines the role of type III IFN  
287 signaling in the control of EV-D68 infection in the respiratory, but not intestinal, epithelium.

288           We found that most isolates of EV-D68 efficiently replicated in both respiratory and  
289 intestinal epithelial cell lines, although there were some isolate-specific differences in temperature  
290 sensitivity. By comparison, primary HBE cells were less permissive to EV-D68 infection. One  
291 isolate, KY/14/18953, replicated very efficiently in primary HBE from either the apical or  
292 basolateral domains at both 33°C and 37°C, but exhibited a preferential release into the apical  
293 compartment. Another isolate, IL/14/18952, infected preferentially from the basolateral surface,  
294 but similarly was released into the apical compartment. The historic isolate MD/09/23229 and  
295 contemporary isolate MA/18/23089 replicated to comparably lower levels in all conditions but  
296 shared an apical release preference. Despite high levels of infection in the intestinal-derived  
297 Caco-2 cell line, only one isolate, KY/14/18953, replicated to high titers in stem cell-derived  
298 enteroids, although the contemporary isolate MA/18/23089 also replicated to low, but detectable,  
299 levels which improved when access to the apical surface was available. These studies point to  
300 key differences in the susceptibility of different primary epithelial-derived cell models to EV-D68  
301 infection and suggest that host factors likely influence this tropism. For example, although  
302 attachment factors have been identified for EV-D68, including sialic acid and decay accelerating  
303 factor (DAF), some contemporary strains of EV-D68 including KY/14/18953 do not bind to  
304 sialylated receptors and their role in mediating infection is unknown (Baggen et al., 2016;  
305 Blomqvist et al., 2002). In addition, the neuron-specific intercellular adhesion molecule 5 (ICAM-  
306 5/telencephalin) has been identified as a potential receptor for several historic and contemporary  
307 isolates of EV-D68, but restricted expression in other cell types makes it unclear what role it might  
308 play in the epithelium (Hixon et al., 2019; Wei et al., 2016).

309           Previous work with EV-D68 before the emergence of AFM suggested that due to  
310 preferences for replication at 33°C and sensitivity to acid *in vitro*, it was more suited to be a  
311 respiratory pathogen behaving similarly to rhinoviruses as opposed to other enteroviruses (Liu et  
312 al., 2018; Oberste, 2004). While previous studies have evaluated acid stability of EV-D68, we  
313 utilized biologically relevant solutions with complexities other than acidity, such as bile acid and

314 phospholipids, that more closely mimic the gastrointestinal environment. Our studies using  
315 multiple contemporary isolates after the emergence of AFM suggest that these isolates are  
316 relatively stable at 37°C and also have improved acid stability. However, none of the EV-D68  
317 isolates tested were stable during even short incubations with the most acidic fluid, the simulated  
318 fasted state stomach fluid, at a pH of 2. Our data also indicate that many isolates of EV-D68, even  
319 those associated with AFM outbreaks, are unable to replicate efficiently in human enteroids.  
320 However, one contemporary isolate, KY/14/18953, replicated to high levels in human enteroids  
321 and we observed replication of the contemporary isolate MA/18/23089 when primary intestinal  
322 enteroids were cultured on Transwell inserts. The basis for the very high capacity of KY/14/18953  
323 to replicate in enteroids is unknown, but this isolate is genetically unique, and it is one of the very  
324 few members of the newly defined clade D, which thereby exhibits significant sequence variation  
325 in the VP1 region often used for receptor binding. These data suggest that the intestinal epithelium  
326 might serve as a site of EV-D68 transmission, particularly for some isolates.

327         The pro-viral factors that mediate EV-D68 infection in the epithelium remain largely  
328 unknown, but our studies suggest that the induction of IFN signaling plays a major role in  
329 restricting replication in the airway epithelium. We have shown previously that type III IFNs are  
330 preferentially induced by enterovirus infections in human enteroids and that this signaling restricts  
331 replication (Drummond et al., 2017; Good et al., 2019). In addition, type III IFNs are also the  
332 dominant IFNs induced in response to influenza, RSV, measles, and mumps infections of  
333 respiratory epithelial cells (Crotta et al., 2013; Fox et al., 2015; Galani et al., 2017; Jewell et al.,  
334 2010; Okabayashi et al., 2011). Although the type I IFN IFN- $\beta$  was induced in response to EV-  
335 D68 infection, its induction was delayed compared to type III IFNs. Of note, we observed  
336 significant induction of IFNs even when levels of infection were not detectable, highlighting the  
337 potency by which the airway epithelium responds to these infections. The induction of IFNs is  
338 likely one mechanism by which the airway restricts EV-D68 replication, which is supported by our  
339 findings that treatment of HBE with ruxolitinib increased infection. However, it should be noted

340 that ruxolitinib only partially recovers infection, suggesting other cellular pathways in addition to  
341 IFN also restrict infection. Surprisingly, despite robust IFN induction in response to EV-D68  
342 infection of primary HBE, primary human enteroids did not mount any detectable IFN response to  
343 EV-D68 infection, suggesting that there are important differences in the capacity of the respiratory  
344 and airway epithelium to sense and respond to EV-D68 infection. The lack of antiviral signaling in  
345 infected enteroids would appear to be specific for EV-D68, as we have shown previously that  
346 enteroids infected with other enteroviruses including CVB, echoviruses, and EV71 respond via  
347 the induction of type III IFNs (Drummond et al., 2017; Good et al., 2019). While the mechanistic  
348 basis for this is unknown, differences in viral antagonism strategies and/or host detection  
349 mechanisms may explain these differences.

350           Currently there are no available no virus-specific treatments or vaccines to prevent AFM,  
351 which is a critically important emerging illness with significant morbidity to young children. Further  
352 understanding how EV-D68 targets the airway and/or gastrointestinal epithelium are critical to  
353 improve our understanding of how is transmitted, particularly given increases in its circulation.  
354 Our work presented here provides important insights into the dynamics of EV-D68 replication in  
355 the human airway and intestinal epithelium and provide ideal models to develop and test anti-EV-  
356 D68 therapeutics.

357

## 358 **Materials and Methods**

### 359 *Cell culture*

360 HeLa cells were provided by Dr. Jefferey Bergelson, Children's Hospital of Philadelphia,  
361 Philadelphia, PA, and grown in MEM, with 5% FBS, non-essential amino acids, and  
362 penicillin/streptomycin. Calu-3 cells (HTB-55) were obtained from the ATCC grown in MEM w/  
363 10% FBS and 1% pen/strep and Caco-2 cells (BBE clone, CRL-2101) were obtained from the  
364 ATCC and grown in DMEM with 10% FBS and 1% pen/strep.

365

366 *Human intestinal enteroids*

367 Human intestinal enteroid lines were derived as previously described by isolation of intestinal  
368 crypts from small intestine (Drummond et al., 2017) obtained from the University of Pittsburgh  
369 Biospecimen Core through an honest broker system after approval from the University of  
370 Pittsburgh Institutional Review Board and in accordance with the University of Pittsburgh  
371 anatomical tissue procurement guidelines and frozen. Enteroid lines were thawed, passaged, and  
372 maintained as previously described (Stewart et al., 2020) in Matrigel. Experiments with enteroids  
373 were performed on a Matrigel coating or on Transwell inserts, as detailed in the text. Crypt culture  
374 medium was composed of Advanced DMEM/F12 (Invitrogen) with 20% HyClone ES (embryonic  
375 stem) Cell Screened Fetal Bovine Serum (Thermo Fisher Scientific), 1% penicillin/streptomycin  
376 (Invitrogen), 1% L-glutamine, 1% *N*-acetylcysteine (100 mM; Sigma-Aldrich), 1% *N*-2 supplement  
377 (100×; Invitrogen), 2% B27 supplement (50×; Invitrogen), Gibco HEPES (*N*-2-  
378 hydroxyethylpiperazine-*N*-2-ethane sulfonic acid, 0.05 mM; Invitrogen), ROCK Inhibitor Y-27632  
379 (1 mM, 100×; Sigma) and supplemented with the following growth factors: WNT3a, R-spondin,  
380 and Noggin as produced by preconditioned media from WRN cells obtained from the ATCC (CRL-  
381 3276) and described previously (Miyoshi and Stappenbeck, 2013) and hEGF (50 ng/ml; Thermo  
382 Fisher Scientific) (Egan et al., 2016; Shaffiey et al., 2016) and was changed every 48-72 hours  
383 throughout culturing.

384

385 *Human Bronchial Epithelial Cells (HBE)*

386 Primary HBE cells were differentiated from human lung tissue by following an IRB-approved  
387 protocol and were maintained at an air-liquid interface with differentiation media changed twice  
388 per week, as described previously (Myerburg et al., 2010). Differentiation media (BEGM/Ultrosor  
389 G; Pall Corporation, Crescent Chemical Company, Islandia, NY) was comprised of 5 µg/ml insulin,  
390 10 µg/ml transferrin, 0.07 µg/ml hydrocortisone, 0.6 µg/ml epinephrine, 0.8% vol/vol bovine  
391 hypothalamus extract, 0.5 mg/mL BSA, 0.5 µM ethanolamine, 15 ng/ml retinoic acid, 0.5 ng/ml



392 human epidermal growth factor, 10 nM triiodothyronine, 0.5  $\mu$ M phosphoethanolamine, and 0.5%  
393 vol/vol Ultrosor G (USG) in Dulbecco's MEM (DMEM)/F12. Cells were cultured for 3-6 weeks in  
394 order to differentiate and achieve a mucociliary phenotype on phase contrast microscopy prior to  
395 all experiments. Mucus was removed by extensive washes in 1x PBS prior to infection.

396

### 397 *Viruses and Infections*

398 Experiments were performed with a panel of EV-D68 viruses described in **Supplemental Table**  
399 **1**. Viruses were grown in HeLa cells at 33°C in 5% CO<sub>2</sub> until CPE was observed, purified by  
400 ultracentrifugation over a 30% sucrose cushion as previously described (Morosky et al., 2016).  
401 Purity of all viral stocks was confirmed by Sanger sequencing of VP1 using enterovirus-specific  
402 primers, as described previously (Oberste et al., 2003). Plaque assays were performed in HeLa  
403 cells overlaid with 1% agarose, incubated for 72 h, and plaques counted after staining with  
404 crystal violet. Viruses were obtained from the ATCC or were provided by the Center for Disease  
405 Control and Prevention (CDC) as noted in **Supplemental Table 1**.

406 For infections, cells were infected with 10<sup>6</sup> plaque-forming units (PFU) of indicated viral  
407 isolates. Virus was adsorbed to the cell surface (apical or basolateral as indicated) for 1 hour at  
408 room temperature, cells were then washed with PBS, and then media replaced prior to placement  
409 back in the incubator at the indicated temperature for the indicated times. For viral replication  
410 analysis, aliquots of media were collected at indicated times post-infection and virus was detected  
411 via TCID<sub>50</sub> assays in HeLa cells. For HBE growth experiments, media was applied to the apical  
412 surface at the indicated timepoint and incubated for 30 minutes at the experimental temperature  
413 prior to collection.

### 414 *Simulated intestinal fluids*



415 Simulated gastric fluid powders fasted state gastric fluid (FaSSGF), fasted state small intestinal  
416 fluid (FaSSIF), and fed state small intestine (FeSSIF) (Biorelevant) were prepared as described  
417 by the manufacturer.  $10^6$  PFU/mL of the indicated virus was incubated in FaSSGF, FaSSIF,  
418 FeSSIF, or DMEM for the indicated time at 37°C. A one mL aliquot was collected, neutralized to  
419 pH 7.0 with 2.5M sodium hydroxide, and then replication competence was assessed via TCID50  
420 assay.

#### 421 *qPCR*

422 Total RNA was isolated from cells using the Sigma GenElute Total Mammalian RNA Miniprep Kit,  
423 according to the manufacturer protocol with the addition of a Sigma DNase digest reagent. RNA  
424 (1mg total) was reverse transcribed using iScript cDNA Synthesis Kit (Bio-Rad) and diluted to 100  
425  $\mu$ l in ddH<sub>2</sub>O for subsequent qPCR. RT-qPCR was performed using the iQ SYBR Green Supermix  
426 or iTaq Universal SYBR Green Supermix (Bio-Rad) on a CFX96 Touch Real-Time PCR Detection  
427 System (Bio-Rad). Gene expression was determined on the basis of a  $\Delta C_Q$  method, normalized  
428 to human actin. Primer sequences can be found in **Supplemental Table 2**.

#### 429 *RNASeq*

430 Total RNA was extracted as described above. RNA quality and concentration were determined  
431 by NanoDrop, then 1  $\mu$ g of RNA was used for library preparation with TruSeq Stranded mRNA  
432 Library Preparation Kit (Illumina) per the manufacturer's instructions. Illumina NextSeq 500 was  
433 used for sequencing. RNA-seq FASTQ data were processed and mapped to the human reference  
434 genome (hg38) with the CLC Genomics Workbench 20 (Qiagen). Differential gene expression  
435 was analyzed with the DESeq2 package in R (Drummond et al., 2015). Raw sequencing files  
436 have been deposited in Sequence Read Archives and are publicly available (PRJNA688898).

#### 437 *Luminex assays*

438 Luminex profiles utilized the Human Inflammation Panel 1 37-plex assay kit (Bio-Rad) per the  
439 manufacturer's protocol using the laboratory multianalyte profiling system (MAGPIX) developed  
440 by Luminex Corporation (Austin, TX).

441

#### 442 *Inhibitor treatments*

443 HBE cells or enteroids on MG coats were incubated with 5  $\mu$ M ruxolitinib or dimethyl sulfoxide  
444 (DMSO) control for 1 hour at 37°C and then infected with the indicated EV-D68 isolate in the  
445 presence of ruxolitinib or DMSO.

#### 446 *Statistics*

447 Statistical analysis was performed with GraphPad Prism software version 8.4.3. Experiments  
448 were performed at least three times and primary cells from at least two genetically distinct donors  
449 were utilized for each experiment. Data are presented as mean  $\pm$  standard deviation. Student's *t*  
450 test or one-way analysis of variance (ANOVA) was used to determine significance, as indicated  
451 in figure legends, for normally distributed data. Growth curve analysis was completed using two-  
452 way ANOVAs. *P* values of  $<0.05$  was considered significant and are indicated in the figure  
453 legends.

454

455

456

## 457 **References**

- 458 Baggen, J., Thibaut, H.J., Staring, J., Jae, L.T., Liu, Y., Guo, H., Slager, J.J., Bruin, J.W. de,  
459 Vliet, A.L.W. van, Blomen, V.A., et al. (2016). Enterovirus D68 receptor requirements unveiled  
460 by haploid genetics. *Proc National Acad Sci* *113*, 1399–1404.
- 461 Bisseux, M., Colombet, J., Mirand, A., Roque-Afonso, A.-M., Abravanel, F., Izopet, J.,  
462 Archimbaud, C., Peigue-Lafeuille, H., Debroas, D., Bailly, J.-L., et al. (2018). Monitoring human  
463 enteric viruses in wastewater and relevance to infections encountered in the clinical setting: a  
464 one-year experiment in central France, 2014 to 2015. *Eurosurveillance* *23*, 17–00237.
- 465 Blomqvist, S., Savolainen, C., Raman, L., Roivainen, M., and Hovi, T. (2002). Human  
466 Rhinovirus 87 and Enterovirus 68 Represent a Unique Serotype with Rhinovirus and  
467 Enterovirus Features. *Journal of Clinical Microbiology* *40*, 4218–4223.
- 468 Brown, D.M., Hixon, A.M., Oldfield, L.M., Zhang, Y., Novotny, M., Wang, W., Das, S.R.,  
469 Shabman, R.S., Tyler, K.L., and Scheuermann, R.H. (2018). Contemporary Circulating  
470 Enterovirus D68 Strains Have Acquired the Capacity for Viral Entry and Replication in Human  
471 Neuronal Cells. *MBio* *9*, 2508–2517.
- 472 CDC (2020). AFM Cases and Outbreaks. 2 Dec. 2020, [www.cdc.gov/acute-flaccid-](http://www.cdc.gov/acute-flaccid-myelitis/cases-in-us.html)  
473 [myelitis/cases-in-us.html](http://www.cdc.gov/acute-flaccid-myelitis/cases-in-us.html).
- 474 Crotta, S., Davidson, S., Mahlakoiv, T., Desmet, C.J., Buckwalter, M.R., Albert, M.L., Staeheli,  
475 P., and Wack, A. (2013). Type I and Type III Interferons Drive Redundant Amplification Loops to  
476 Induce a Transcriptional Signature in Influenza-Infected Airway Epithelia. *Plos Pathog* *9*,  
477 e1003773.
- 478 Drummond, C.G., Nickerson, C.A., and Coyne, C.B. (2015). A Three-Dimensional Cell Culture  
479 Model To Study Enterovirus Infection of Polarized Intestinal Epithelial Cells. *MSphere* *1*,  
480 e00030-15–17.
- 481 Drummond, C.G., Bolock, A.M., Ma, C., Luke, C.J., Good, M., and Coyne, C.B. (2017).  
482 Enteroviruses infect human enteroids and induce antiviral signaling in a cell lineage-specific  
483 manner. *Proceedings of the National Academy of Sciences* *114*, 1672–1677.
- 484 Du, J., Zheng, B., Zheng, W., Li, P., Kang, J., Hou, J., Markham, R., Zhao, K., and Yu, X.-F.  
485 (2015). Analysis of Enterovirus 68 Strains from the 2014 North American Outbreak Reveals a  
486 New Clade, Indicating Viral Evolution. *Plos One* *10*, e0144208.
- 487 Egan, C.E., Sodhi, C.P., Good, M., Lin, J., Jia, H., Yamaguchi, Y., Lu, P., Ma, C., Branca, M.F.,  
488 Weyandt, S., et al. (2016). Toll-like receptor 4–mediated lymphocyte influx induces neonatal  
489 necrotizing enterocolitis. *J Clin Invest* *126*, 495–508.
- 490 Fox, J.M., Crabtree, J.M., Sage, L.K., Tompkins, S.M., and Tripp, R.A. (2015). Interferon  
491 Lambda Upregulates IDO1 Expression in Respiratory Epithelial Cells After Influenza Virus  
492 Infection. *J Interf Cytokine Res* *35*, 554–562.
- 493 Foxman, E.F., Storer, J.A., Fitzgerald, M.E., Wasik, B.R., Hou, L., Zhao, H., Turner, P.E., Pyle,  
494 A.M., and Iwasaki, A. (2015). Temperature-dependent innate defense against the common cold

- 495 virus limits viral replication at warm temperature in mouse airway cells. *Proc National Acad Sci*  
496 *112*, 827–832.
- 497 Galani, I.E., Triantafyllia, V., Eleminiadou, E.-E., Koltsida, O., Stavropoulos, A., Manioudaki, M.,  
498 Thanos, D., Doyle, S.E., Kottenko, S.V., Thanopoulou, K., et al. (2017). Interferon- $\lambda$  Mediates  
499 Non-redundant Front-Line Antiviral Protection against Influenza Virus Infection without  
500 Compromising Host Fitness. *Immunity* *46*, 875-890.e6.
- 501 Good, C., Wells, A.I., and Coyne, C.B. (2019). Type III interferon signaling restricts enterovirus  
502 71 infection of goblet cells. *Sci Adv* *5*, eaau4255.
- 503 Hadfield, J., Megill, C., Bell, S.M., Huddleston, J., Potter, B., Callender, C., Sagulenko, P.,  
504 Bedford, T., and Neher, R.A. (2018). Nextstrain: real-time tracking of pathogen evolution.  
505 *Bioinformatics* *34*, 4121–4123.
- 506 Hixon, A.M., Yu, G., Leser, J.S., Yagi, S., Clarke, P., Chiu, C.Y., and Tyler, K.L. (2017). A  
507 mouse model of paralytic myelitis caused by enterovirus D68. *PLOS Pathogens* *13*, e1006199-  
508 19.
- 509 Hixon, A.M., Clarke, P., and Tyler, K.L. (2019). Contemporary circulating enterovirus D68  
510 strains infect and undergo retrograde axonal transport in spinal motor neurons independent of  
511 sialic acid. *Journal of Virology* 1–39.
- 512 Imamura, T., Okamoto, M., Nakakita, S. -i, Suzuki, A., Saito, M., Tamaki, R., Lupisan, S., Roy,  
513 C.N., Hiramatsu, H., Sugawara, K. -e, et al. (2014). Antigenic and Receptor Binding Properties  
514 of Enterovirus 68. *J Virol* *88*, 2374–2384.
- 515 Jewell, N.A., Cline, T., Mertz, S.E., Smirnov, S.V., Flaño, E., Schindler, C., Grieves, J.L., Durbin,  
516 R.K., Kottenko, S.V., and Durbin, J.E. (2010). Lambda Interferon Is the Predominant Interferon  
517 Induced by Influenza A Virus Infection In Vivo  $\nabla$ . *J Virol* *84*, 11515–11522.
- 518 Liu, Y., Sheng, J., Vliet, A.L.W. van, Buda, G., Kuppeveld, F.J.M. van, and Rossmann, M.G.  
519 (2018). Molecular basis for the acid-initiated uncoating of human enterovirus D68. *Proceedings*  
520 *of the National Academy of Sciences* *115*, E12209–E12217.
- 521 Messacar, K., Schreiner, T.L., Maloney, J.A., MD, A.W., Ludke, J., Oberste, M.S., Nix, W.A.,  
522 PhD, C.C.R., MD, M.P.G., MD, M.J.A., et al. (2015). A cluster of acute flaccid paralysis and  
523 cranial nerve dysfunction temporally associated with an outbreak of enterovirus D68 in children  
524 in Colorado, USA. *The Lancet* *385*, 1662–1671.
- 525 Midgley, C.M., Watson, J.T., Nix, W.A., Curns, A.T., Rogers, S.L., Brown, B.A., Conover, C.,  
526 Dominguez, S.R., Feikin, D.R., Gray, S., et al. (2015). Severe respiratory illness associated with  
527 a nationwide outbreak of enterovirus D68 in the USA (2014): a descriptive epidemiological  
528 investigation. *Lancet Respir Medicine* *3*, 879–887.
- 529 Mishra, N., Ng, T.F.F., Marine, R.L., Jain, K., Ng, J., Thakkar, R., Caciula, A., Price, A., Garcia,  
530 J.A., Burns, J.C., et al. (2019). Antibodies to Enteroviruses in Cerebrospinal Fluid of Patients  
531 with Acute Flaccid Myelitis. *Mbio* *10*, e01903-19.

- 532 Miyoshi, H., and Stappenbeck, T.S. (2013). In vitro expansion and genetic modification of  
533 gastrointestinal stem cells in spheroid culture. *Nat Protoc* 8, 2471–2482.
- 534 Morosky, S., Lennemann, N.J., and Coyne, C.B. (2016). BPIFB6 Regulates Secretory Pathway  
535 Trafficking and Enterovirus Replication. *Journal of Virology* 90, 5098–5107.
- 536 Myerburg, M.M., Harvey, P.R., Heidrich, E.M., Pilewski, J.M., and Butterworth, M.B. (2010).  
537 Acute Regulation of the Epithelial Sodium Channel in Airway Epithelia by Proteases and  
538 Trafficking. *Am J Resp Cell Mol* 43, 712–719.
- 539 Oberste, M.S. (2004). Enterovirus 68 is associated with respiratory illness and shares biological  
540 features with both the enteroviruses and the rhinoviruses. *Journal of General Virology* 85, 2577–  
541 2584.
- 542 Oberste, M.S., Nix, W.A., Maher, K., and Pallansch, M.A. (2003). Improved molecular  
543 identification of enteroviruses by RT-PCR and amplicon sequencing. *J Clin Virol* 26, 375–377.
- 544 Okabayashi, T., Kojima, T., Masaki, T., Yokota, S., Imaizumi, T., Tsutsumi, H., Himi, T., Fujii, N.,  
545 and Sawada, N. (2011). Type-III interferon, not type-I, is the predominant interferon induced by  
546 respiratory viruses in nasal epithelial cells. *Virus Res* 160, 360–366.
- 547 Pham, N.T.K., Thongprachum, A., Baba, T., Okitsu, S., Trinh, Q.D., Komine-Aizawa, S.,  
548 Shimizu, H., Hayakawa, S., and Ushijima, H. (2017). A 3-Month-Old Child with Acute  
549 Gastroenteritis with Enterovirus D68 Detected from Stool Specimen. *Clin Lab* 63, 1269–1272.
- 550 Sagulenko, P., Puller, V., and Neher, R.A. (2018). TreeTime: Maximum-likelihood phylodynamic  
551 analysis. *Virus Evol* 4, vex042-.
- 552 Schieble, J.H., Fox, V.L., and Lennette, E.H. (1967). A probable new human picornavirus  
553 associated with respiratory disease. *Am J Epidemiol* 85, 297–310.
- 554 Schubert, R.D., Hawes, I.A., Ramachandran, P.S., Ramesh, A., Crawford, E.D., Pak, J.E., Wu,  
555 W., Cheung, C.K., Donovan, B.D.O. x02019, Tato, C.M., et al. (2019). Pan-viral serology  
556 implicates enteroviruses in acute flaccid myelitis. *Nature Medicine* 1–18.
- 557 Shaffiey, S.A., Jia, H., Keane, T., Costello, C., Wasserman, D., Quidgley, M., Dziki, J., Badylak,  
558 S., Sodhi, C.P., March, J.C., et al. (2016). Intestinal stem cell growth and differentiation on a  
559 tubular scaffold with evaluation in small and large animals. *Regen Med* 11, 45–61.
- 560 Stewart, C.J., Estes, M.K., and Ramani, S. (2020). Innate Lymphoid Cells, Methods and  
561 Protocols. *Methods Mol Biology Clifton N J* 2121, 185–198.
- 562 Sun, J., Hu, X.-Y., and Yu, X.-F. (2019). Current Understanding of Human Enterovirus D68.  
563 *Viruses* 11, 490.
- 564 Tokarz, R., Firth, C., Madhi, S.A., Howie, S.R.C., Wu, W., Sall, A.A., Haq, S., Briese, T., and  
565 Lipkin, W.I. (2012). Worldwide emergence of multiple clades of enterovirus 68. *J Gen Virol* 93,  
566 1952–1958.

567 Wei, W., Guo, H., Chang, J., Yu, Y., Liu, G., Zhang, N., Willard, S.H., Zheng, S., and Yu, X.-F.  
568 (2016). ICAM-5/Telencephalin Is a Functional Entry Receptor for Enterovirus D68. *Cell Host &*  
569 *Microbe* 20, 631–641.

570 Weil, M., Mandelboim, M., Mendelson, E., Manor, Y., Shulman, L., Ram, D., Barkai, G.,  
571 Shemer, Y., Wolf, D., Kra-oz, Z., et al. (2017). Human enterovirus D68 in clinical and sewage  
572 samples in Israel. *J Clin Virol* 86, 52–55.

573

574

575 **Acknowledgements**

576 This work was supported by NIH R01- AI081759 (C.B.C.), the Children's Hospital of Pittsburgh of  
577 the UPMC Health System (C.B.C), NIH T32-AI060525 (A.I.W), NIH F31-AI149866 (A.I.W.), the  
578 Pediatric Infectious Diseases Society/St. Jude Research Hospital Fellowship in Basic and  
579 Translational Research (M.C.F), and the Cystic Fibrosis Foundation Research Development  
580 Program (University of Pittsburgh). All authors declare that they have no competing interests. All  
581 data needed to evaluate the conclusions in the paper are present in the paper and/or the  
582 Supplementary Materials. Additional data related to this paper may be requested from the  
583 corresponding author. The findings and conclusions in this report are those of the author(s) and  
584 do not necessarily represent the official position of the Centers for Disease Control and Prevention  
585 or other contributing agencies.

586

587

588 **Supplemental Table 1: List of viral isolates used in the study**

| Species         | Isolate name      | Abbreviation | D68 clade | Accession # | Source            |
|-----------------|-------------------|--------------|-----------|-------------|-------------------|
| Enterovirus D68 | USA/MD/2009-23229 | MD/09/23229  | A1        | MN240505    | CDC               |
| Enterovirus D68 | US/MO/14-18949    | MO/14/18949  | B1        | KM851227    | CDC               |
| Enterovirus D68 | US/IL/14-18952    | IL/14/18952  | B2        | KM851230    | CDC               |
| Enterovirus D68 | USA/CO/2018-23087 | CO/18/23087  | B3        | MN245981    | CDC               |
| Enterovirus D68 | USA/MA/2018-23089 | MA/18/23089  | B3        | MN245983    | CDC               |
| Enterovirus D68 | US/KY/14-18953    | KY/14/18953  | D1        | KM851231    | ATCC<br>(VR-1825) |
| Enterovirus 71  | 1095              | EV-A71       | N/A       | U22521.1    | ATCC<br>(VR-784)  |
| Echovirus 11    | Gregory           | E11          | N/A       |             | ATCC<br>(VR-41)   |

589

590 **Supplemental Table 2: RT-qPCR Primers**

| Primer target | Sequence-F 5'-3'       | Sequence-R 3'-5'     |
|---------------|------------------------|----------------------|
| CXCL10        | AAAGCAGTTAGCAAGGAAAG   | TCATTGGTCACCTTTTAGTG |
| IFIT1         | CAACCAAGCAAATGTGAGGA   | AGGGGAAGCAAAGAAAATGG |
| actin         | ACTGGGACGACATGGAGAAAAA | GCCACACGCAGCTC       |

591

592

593

594

595

596



597 **Figure 1**

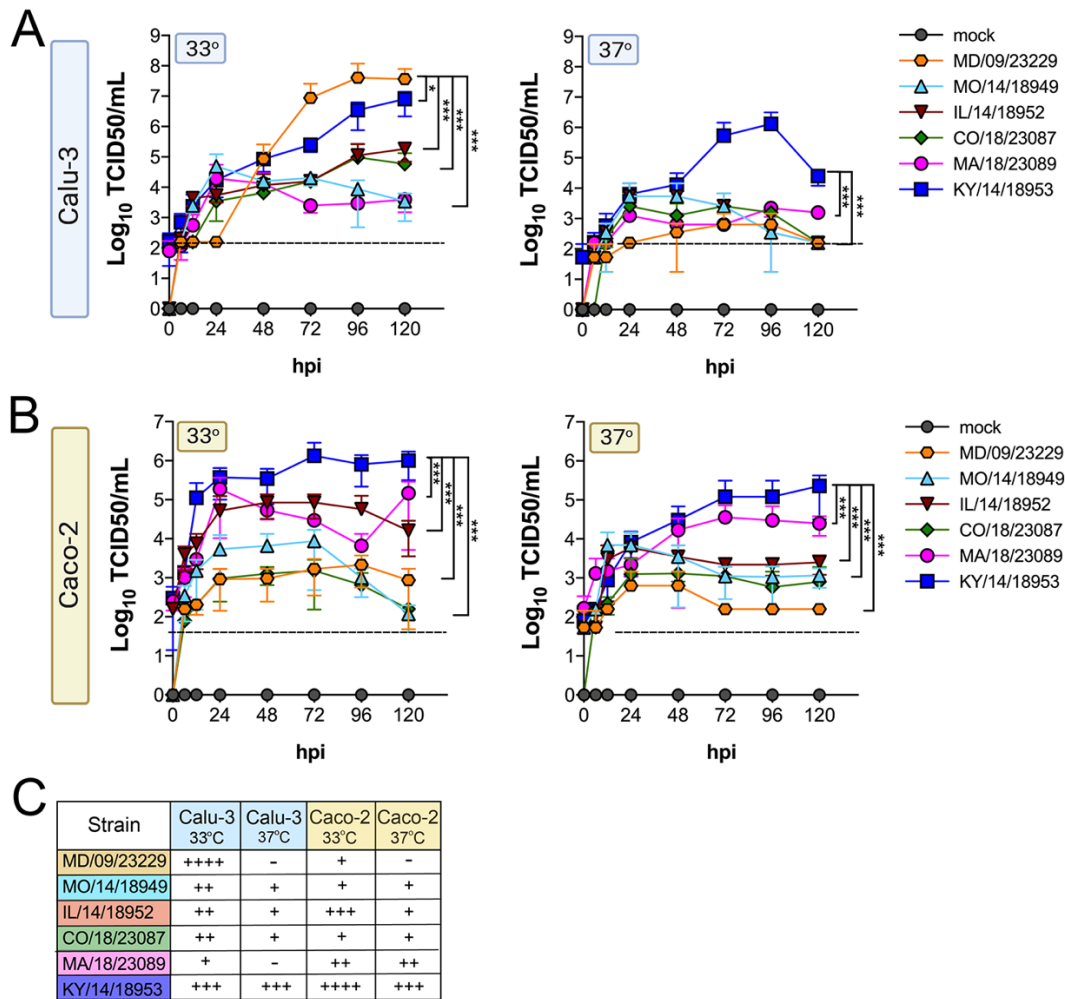

598

599 **Figure 1. EV-D68 replication in lung and intestinal cell lines varies with strain and**  
 600 **temperature.** Calu-3 cells (A) or Caco-2 cells (B) were infected with the EV-D68 strains  
 601 MD/09/23229 (orange), MO/14/18949 (cyan), IL/14/18952 (burgundy), CO/18/23087 (green),  
 602 MA/18/23089 (pink), or KY/14/18953 (blue) at an MOI of 5 and incubated at 33°C or 37°C. The  
 603 supernatant was sampled at the indicated hours post-infection (hpi) and titrated by TCID50. Data  
 604 are shown as mean  $\pm$  standard deviation from three replicates. Dotted line denotes limit of assay  
 605 detection. (C), Summary table denotes titers at 72 hpi, + corresponds to  $10^3$ , ++  $10^4$ , +++  $10^5$ , and  
 606 ++++  $10^6$ . Significance was determined by a Two-way ANOVA with multiple comparisons.  
 607 \* $p < 0.05$ , \*\* $p < 0.005$ , \*\*\* $p < 0.0005$ , \*\*\*\* $p < 0.0001$  compared to the KY/14/18953, which exhibited  
 608 the highest replication levels.

609

610

611

612

613 **Figure 2**

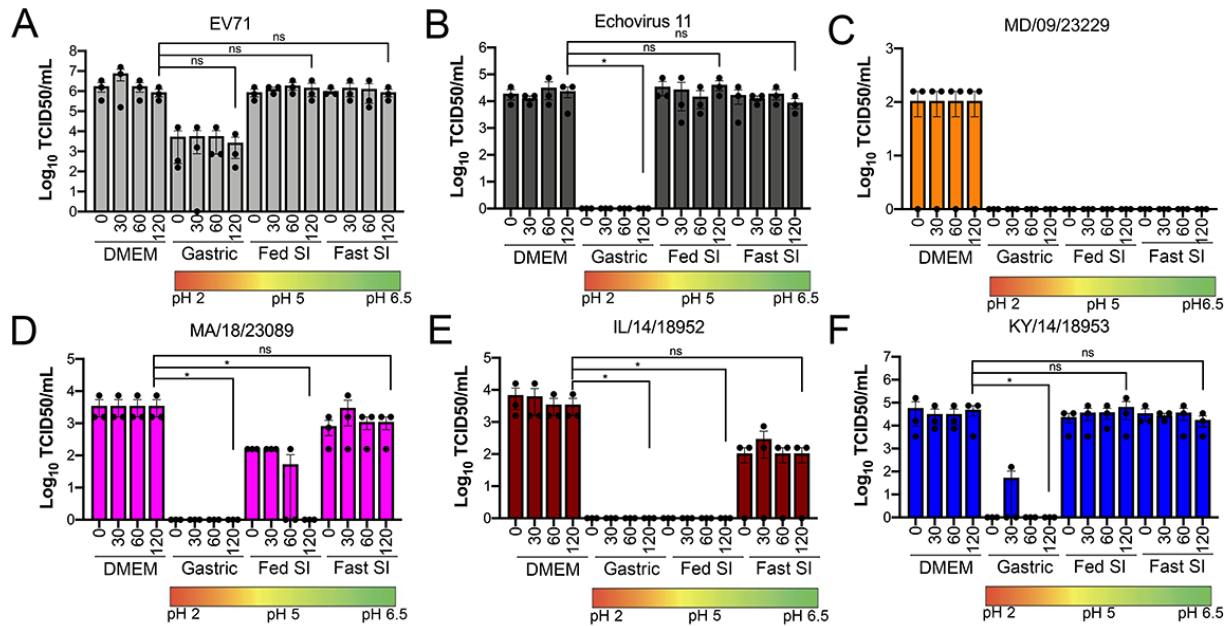

614

615 **Figure 2. Select contemporary EV-D68 strains exhibit increased acid tolerance.** (A),  
 616 Enterovirus 71 (EV71), (B), echovirus 11 (B), or (C-F) the indicated EV-D68 isolates ( $10^6$  PFU/mL)  
 617 were incubated with control medium (DMEM), pH 2 FaSSGF (Gastric), pH 5 FeSSIF (Fed SI), or  
 618 pH 6.5 FaSSIF (Fast SI) solution and incubated at 37°C for the indicated times. An aliquot of the  
 619 virus/fluid mixture was collected, neutralized with sodium hydroxide, and then evaluated for  
 620 infectivity via TCID<sub>50</sub> assays. Titers are shown as mean  $\pm$  standard deviation from three  
 621 independent replicates. Significance was assessed at 120 min post-incubation using a One-Way  
 622 ANOVA compared to DMEM-incubated controls, \* $p < 0.05$ , ns, not significant.  
 623

624

625

626

627

628

629

630

631

632

633 **Figure 3**

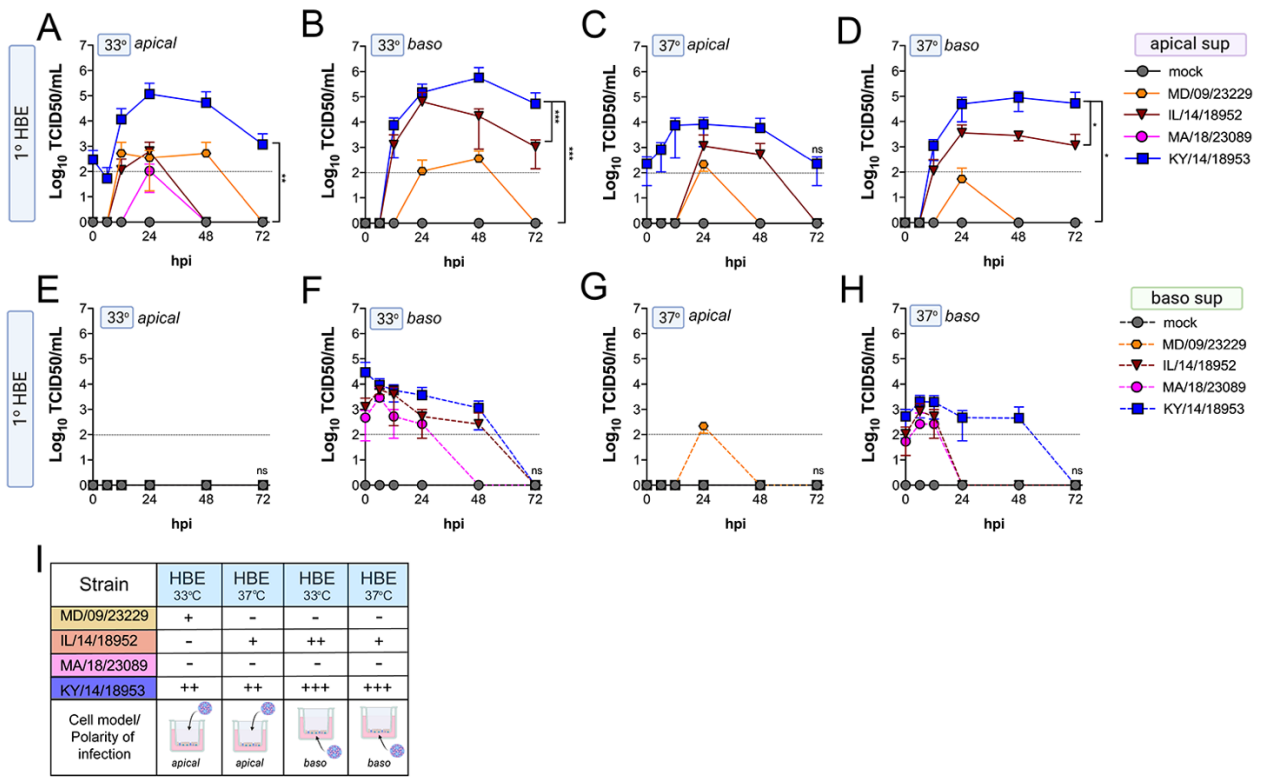

634

635 **Figure 3. Comparison of EV-D68 strain-specific growth characteristics in primary human**  
 636 **airway epithelial cells.** Primary human bronchial epithelial (HBE) cells grown at an air-liquid  
 637 interface were infected with  $10^6$  PFU of the indicated EV-D68 strains: MD/09/23229 (orange),  
 638 IL/14/18952 (burgundy), MA/18/23089 (pink), or KY/14/18953 (blue) and incubated at 33°C (**A**,  
 639 **B**, **E**, **F**) or 37°C (**C**, **D**, **G**, **H**) for the indicated hours post-infection (hpi). HBE were infected from  
 640 either the apical (**A**, **C**, **E**, **G**) or basolateral (**B**, **D**, **F**, **H**) surfaces. Supernatants were sampled at  
 641 the indicated hpi from both apical (**A-D**) and basolateral (**E-H**) compartments and titers  
 642 determined by TCID50 assays. Titters are shown as mean  $\pm$  standard deviation from three  
 643 independent replicates. Dotted line denotes limit of assay detection. (**I**), Summary table denotes  
 644 titer at 48 hpi as collected from the apical compartment (**A-D**), - indicates no detectable replication,  
 645 + corresponds to  $10^3$ , ++  $10^4$ , +++  $10^5$ , and ++++  $10^6$ . Significance determined by two-way  
 646 ANOVA. \* $p < 0.05$ , \*\* $p < 0.005$ , \*\*\* $p < 0.0005$ , \*\*\*\* $p < 0.0001$  compared to the KY/14/18953, which  
 647 exhibited the highest replication levels.

648

649

650

651

652

653

654 **Figure 4**

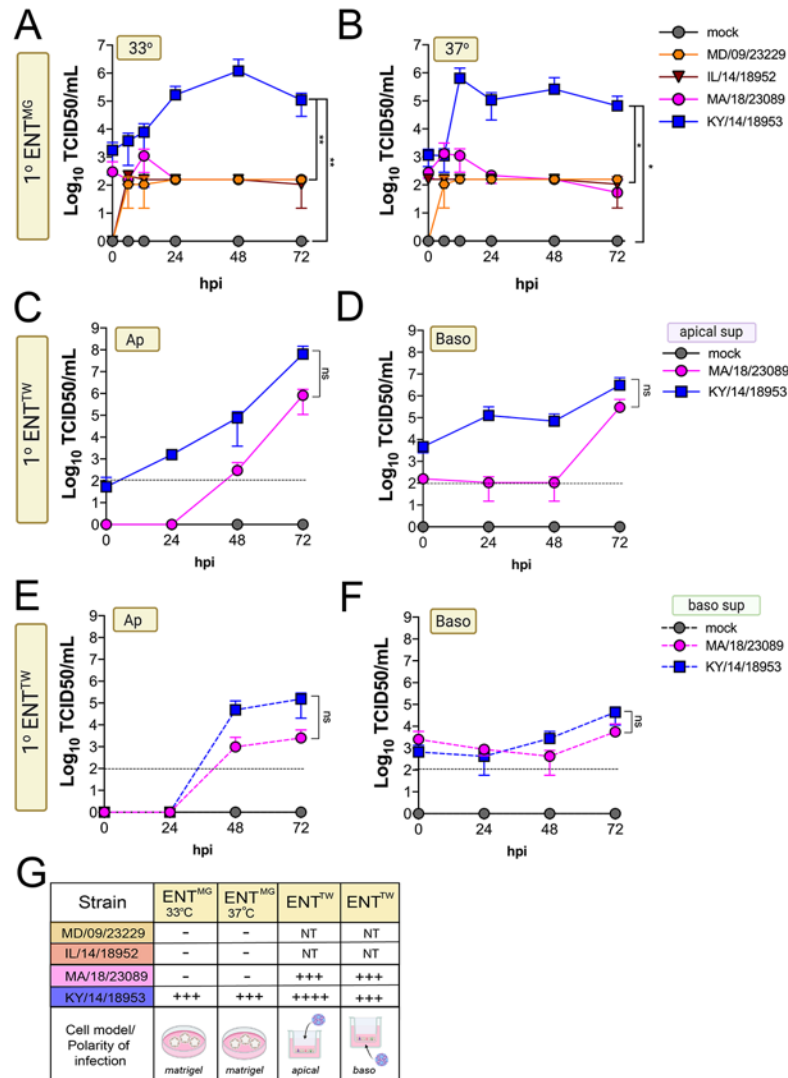

655

656 **Figure 4. Comparison of EV-D68 strain-specific growth characteristics in primary human**  
 657 **enteroids.** Primary enteroids grown on Matrigel (**A-B**) or transwells (**C-F**) were infected with 10<sup>6</sup>  
 658 PFU of the indicated EV-D68 strains: MD/09/23229 (orange), IL/14/18952 (burgundy),  
 659 MA/18/23089 (pink), or KY/14/18953 (blue) and incubated at 33°C (**A**) or 37°C (**B-F**) for the  
 660 indicated hours post-infection (hpi). For intestinal cells grown on transwells, cells were infected  
 661 from either the apical (**C, E**) or basolateral (**D, F**) surfaces. Supernatants were sampled at the  
 662 indicated hpi from both apical (**C-D**) or basolateral (**E-F**) compartments and titers determined by  
 663 TCID50 assays. Titters are shown as mean ± standard deviation from three independent  
 664 replicates. Dotted line denotes limit of assay detection. (**G**), Summary table denotes titer at 72  
 665 hpi, + corresponds to 10<sup>3</sup>, ++ 10<sup>4</sup>, +++ 10<sup>5</sup>, and ++++ 10<sup>6</sup>, NT not tested. Significance determined  
 666 by One-way ANOVA. \*p<0.05, \*\*p<0.005, ns, not significant.

667

668

669 **Figure 5**  
670

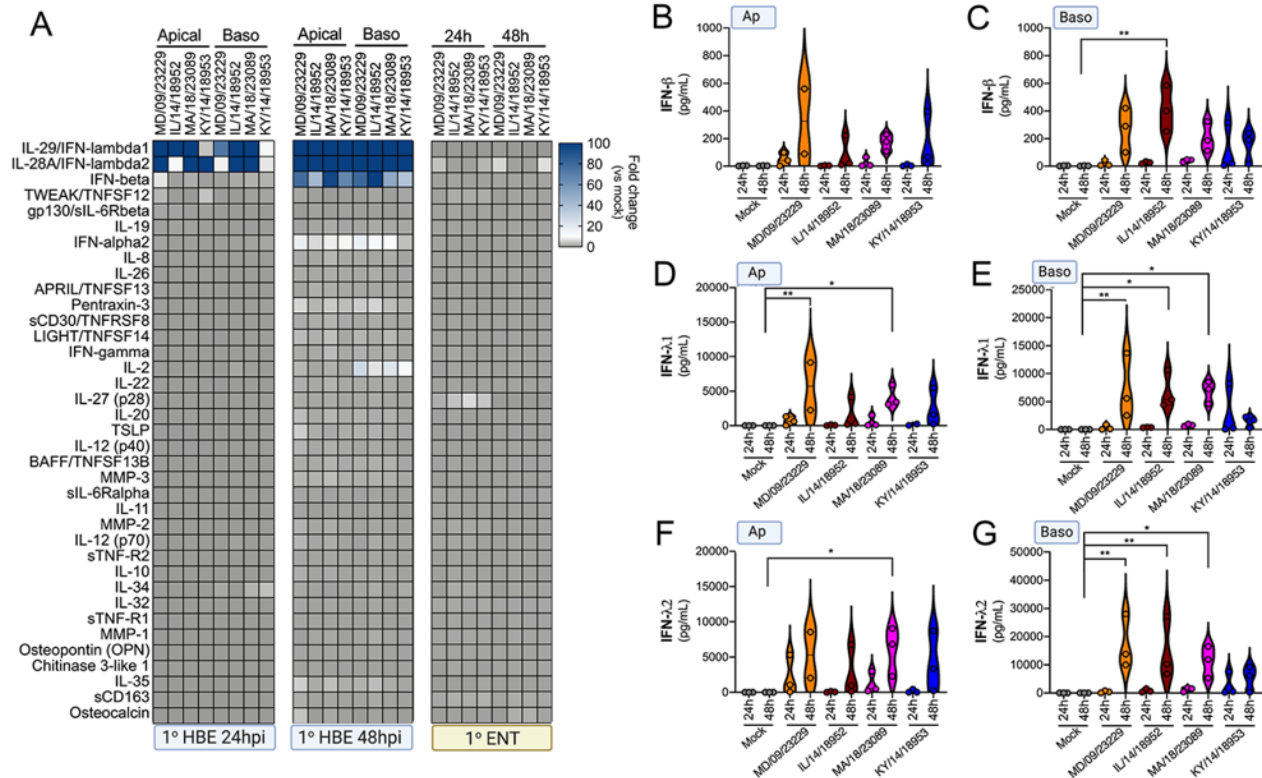

671

672 **Figure 5. EV-D68 infection of primary human airway cells induces a preferential type III IFN**  
673 **response. (A)**, Luminex-based multianalyte profiling of 37 cytokines and chemokines in primary  
674 human bronchial (HBE) cells or enteroids (ENT) infected with  $10^6$  PFU of the indicated EV-D68  
675 strains MD/09/23229, IL/14/18952, MA/18/23089, or KY/14/18953 from the apical or basolateral  
676 surfaces and incubated at 33°C (HBE) or 37°C (ENT). Supernatants were collected from the  
677 apical compartment at 24 and 48 hours post-infection (hpi). Shown is a heatmap based on  
678 cytokines induced relative to mock infected controls (key at right), with blue denoting significantly  
679 increased cytokines in comparison to uninfected. Grey denotes little to no change (scale at top  
680 right). Data are based on three independent experiments. Levels of IFN-β (A, C), IFN-λ1 (D, E),  
681 or IFN-λ2 (F, G) infected from the apical (B, D, F) or basolateral (C, E, G) are shown. Symbols  
682 represent individual biological replicates from unique donor cells. Statistical significance was  
683 determined using a Kruskal-Wallis test, \* $p < 0.05$ , \*\* $p < 0.01$ .  
684

685

686

687

688

689

690

691 **Figure 6**

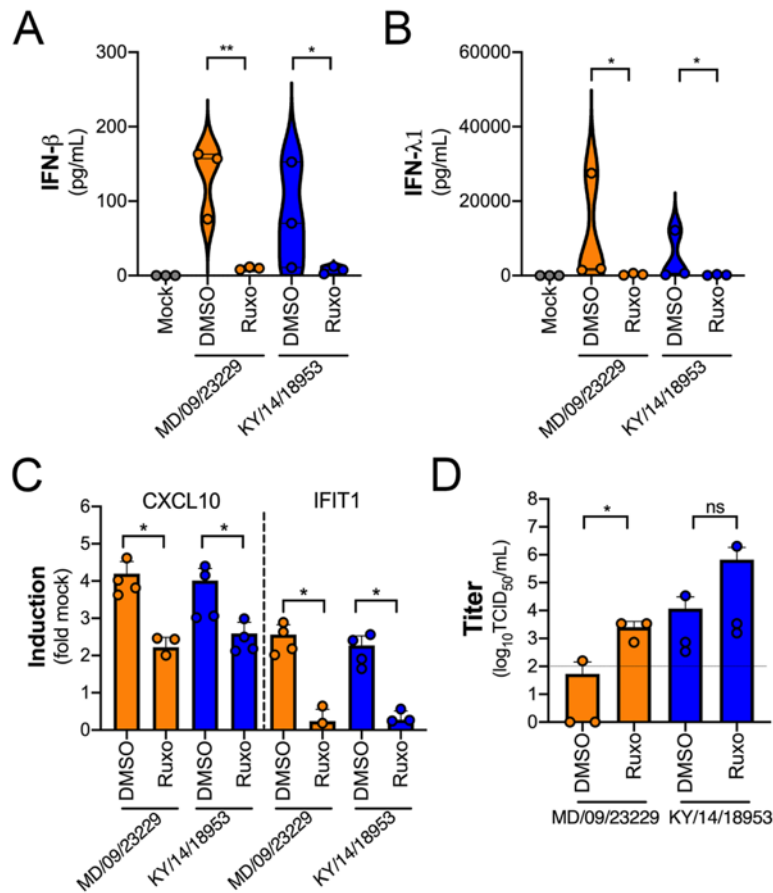

692

693 **Figure 6. IFN signaling restricts EV-D68 replication in primary human airway cells. (A,**  
694 **B)** Levels of IFN-β (A) or IFN-λ1 (B) as determined by Luminex-based assays in medium  
695 harvested from primary human bronchial epithelial (HBE) cells pretreated with the JAK1/2 inhibitor  
696 ruxolitinib (5 mM, Ruxo) or DMSO control for 1 hour and then infected with EV-D68  
697 strains MD/09/23229 or KY/14/18953 as indicated in the presence of inhibitor for 48 hours at  
698 33°C. Symbols represent individual biological replicates from at least two unique  
699 donors. (C), Induction of the interferon stimulated genes (ISGs) CXCL10 or IFIT1 in control  
700 (DMSO)- or Ruxo-treated HBE infected with the EV-D68 strains MD/09/23229 or KY/14/18953  
701 as assessed by RT-qPCR. Symbols represent individual biological replicates from at least two  
702 unique donors. (D), Viral titers in control (DMSO) or Ruxo-treated HBE infected with MD/09/23229  
703 or KY/14/18953 for 48 hours at 33°C. Statistical significance was determined using a Student's t-  
704 test, \*p<0.05, \*\*p<0.01, ns not significant.

705

706

707

708



709 **Supplemental Figure 1**

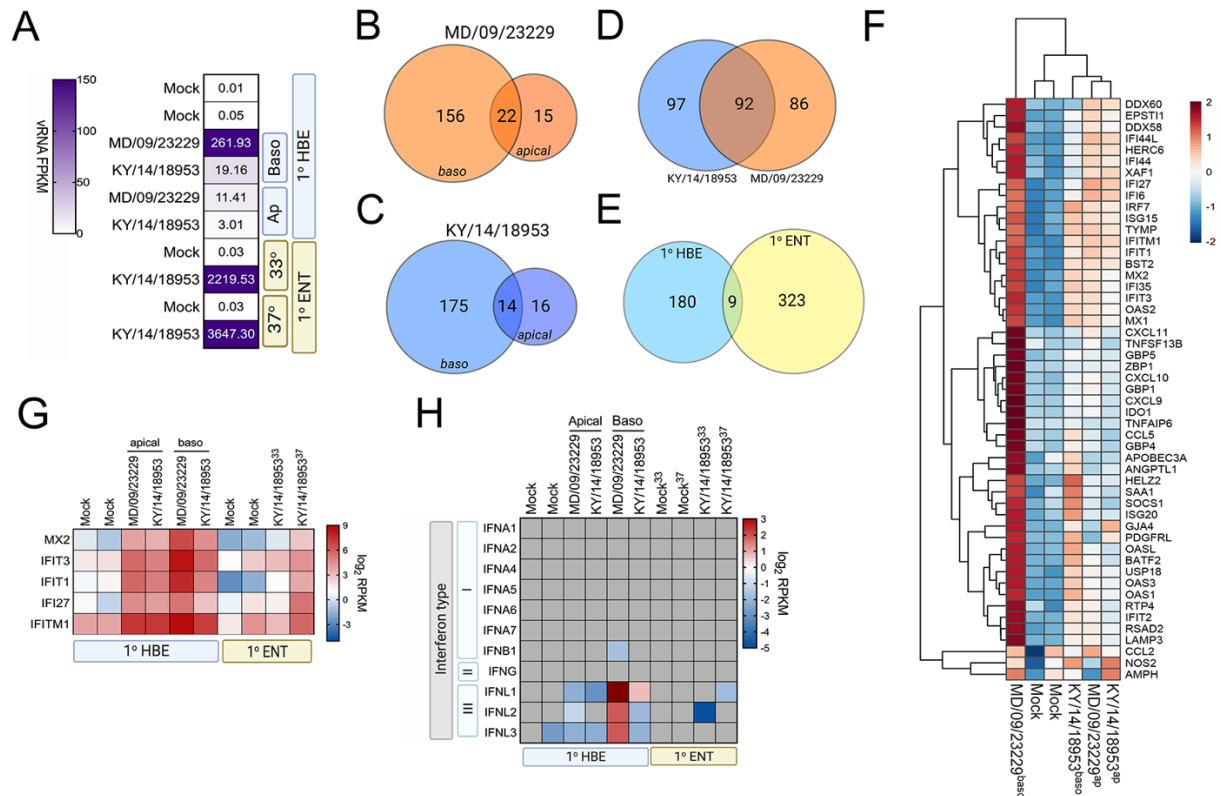

710

711 **Supplemental Figure 1. EV-D68 infection of primary human airway cells induces robust**  
712 **antiviral signaling.** Whole genome RNAseq-based transcriptional profiling from total RNA  
713 isolated from primary human bronchial epithelial (HBE) cells grown at an air-liquid interface or  
714 primary human enteroids infected with EV-D68 isolates MD/09/23229 and KY/14/18953 was  
715 performed in HBE infected from the apical or basolateral domains of in human enteroids infected  
716 at 33°C or 37°C. **(A)** Heatmap of vRNA FPKM (fragments per kilobase per million reads mapped)  
717 values for apical and basolateral infection of HBE with the indicated isolate and of enteroid  
718 infection at 33°C and 37°C with KY/14/18953. Key is at right. Purple indicates high viral reads and  
719 white indicates low viral reads. **(B-E)**, Venn diagrams denoting the overlap in differentially  
720 regulated transcripts in HBE infected from the apical or basolateral domains with MD/09/23229  
721 **(B)** or KY/14/18953 **(C)**, shared between both isolates following basolateral infections **(D)**, and  
722 between HBE and enteroids infected with KY/14/18953 **(E)**. **(F)** Heatmap of select interferon  
723 stimulated genes (ISGs) in primary HBE infected with the indicated isolates of EV-D68 from the  
724 apical of basolateral domains or in mock-infected controls. Scale at right. Red indicates higher  
725 expression and blue indicates lower expression. **(G)**, Heatmap of transcripts upregulated in  
726 infected HBE and enteroids by both strains based on log<sub>2</sub> RPKM values. Key is at right. Red  
727 indicates higher RPKM values, blue represents low RPKM values, and grey represents no reads.  
728 **(H)** Heatmap of transcripts (based on log<sub>2</sub> RPKM) associated with type I, II, or III interferons (IFNs)  
729 in HBE cells infected apically and basolaterally at 33°C with the indicated strains or in enteroids  
730 infected with KY/14/18953 at 33°C or 37°C. Scale at right, Red indicates higher RPKM values,  
731 blue represents low RPKM values, and grey represents no reads.

732

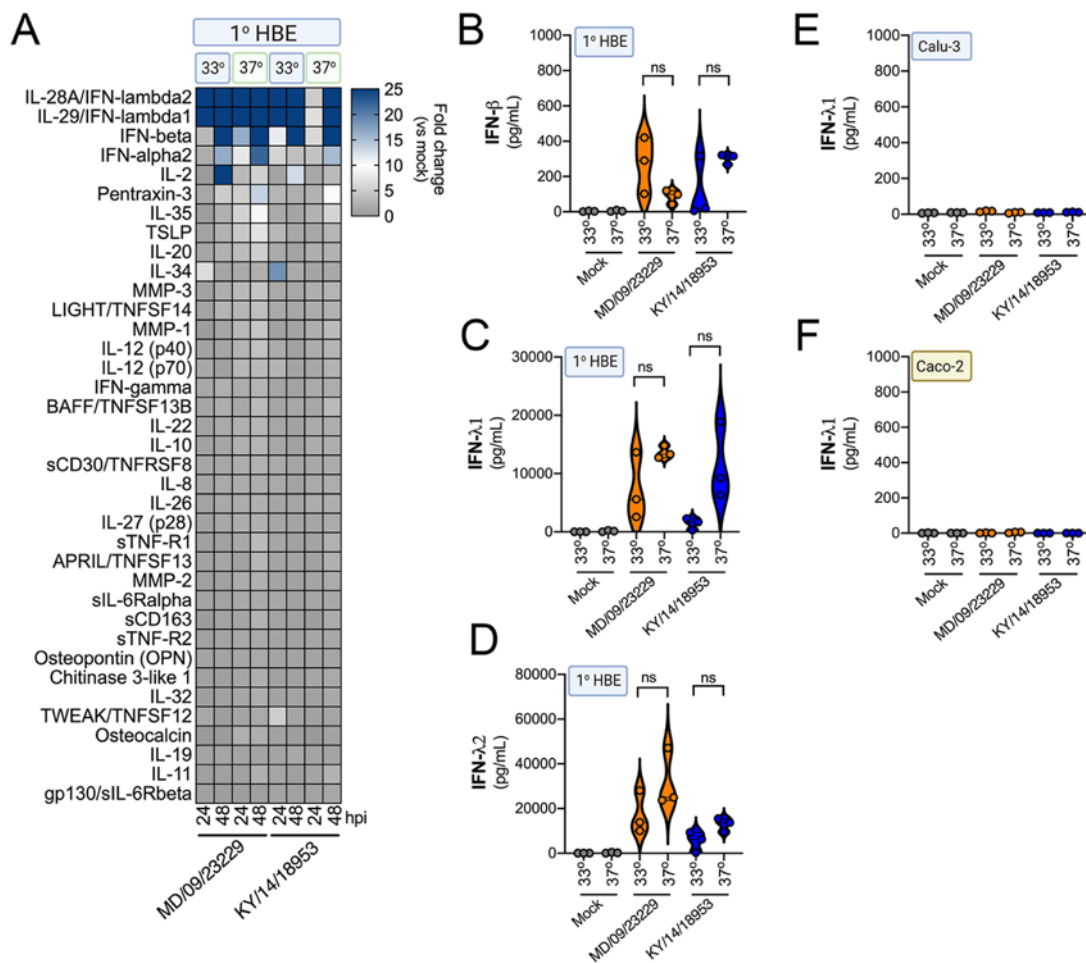

733

734 **Supplemental Figure 2. IFN induction in response to EV-D68 infection is independent of**  
 735 **temperature.** (A), Luminex-based multianalyte profiling of 37 cytokines and chemokines in  
 736 primary human bronchial (HBE) cells infected with  $10^6$  PFU of EV-D68 strains MD/09/23229 or  
 737 KY/14/18953 at 33°C or 37°C. Supernatant was collected from the apical compartment at 24 and  
 738 48 hours post-infection (hpi). Shown is a heatmap based on cytokines induced relative to mock  
 739 infected controls (key at right), with blue denoting significantly increased cytokines in comparison  
 740 to uninfected. Grey denotes little to no change (scale at top right). Data are based on three  
 741 independent experiments. Levels of IFN- $\beta$  (B), IFN- $\gamma$ 1 (C), or IFN- $\gamma$ 2 (D) from HBE infected at 33°C  
 742 or 37°C are shown. Symbols represent individual biological replicates from unique donor cells.  
 743 (E, F), Levels of IFN- $\gamma$ 1 as determined by Luminex-based assays in Calu-3 (E) or Caco-2 (F) cells  
 744 infected with MD/09/23229 or KY/14/18953 at 33°C or 37°C. Symbols represent individual  
 745 biological replicates. Statistical significance was determined using a Student's t-test, not  
 746 significant (ns).  
 747

748

749
